# Supplementary material
Source: HighWire-hosted journal article supplement (http://www.jrheum.org/highwire/filestream/34804/field_highwire_adjunct_files/0/171034DataSuppl.pdf)
Supplement: 171034DataSuppl.pdf [file 171034DataSuppl.pdf]

ONLINE SUPPLEMENTARY DATA

| <b>Supplementary Table 1. Demographics and Clinical Characteristics Overall and by achievement of LDA (N=706)</b> |                     |                                |                                |         |
|-------------------------------------------------------------------------------------------------------------------|---------------------|--------------------------------|--------------------------------|---------|
|                                                                                                                   | All                 | Follow Up<br>CDAI ≤10<br>N=259 | Follow Up<br>CDAI >10<br>N=447 | P value |
| Female N (%) N=704                                                                                                | 402 (57%)           | 119 (46%)                      | 283 (63%)                      | <0.0001 |
| Age (Median- IQR) N=703                                                                                           | 52<br>44-60         | 52<br>42-60                    | 53<br>44-61                    | 0.20    |
| Duration of PsA (years, IQR)<br>N=701                                                                             | 4<br>2-11           | 4<br>1-10                      | 4<br>2-11                      | 0.32    |
| Body mass index (median, IQR)<br>N=705                                                                            | 31.1<br>26.9-36.4   | 29.9<br>26.5-36.0              | 31.7<br>27.5-36.7              | 0.03    |
| Body Mass Index by Category                                                                                       |                     |                                |                                |         |
| ≤25                                                                                                               | 109 (15%)           | 43 (17%)                       | 66 (15%)                       | 0.053   |
| >25-30                                                                                                            | 204 (29%)           | 87 (34%)                       | 117 (26%)                      |         |
| >30                                                                                                               | 392 (56%)           | 129 (50%)                      | 263 (59%)                      |         |
| Calendar Year (Median, IQR)                                                                                       | 2009<br>(2007-2011) | 2009<br>(2007-2010)            | 2009<br>(2007-2011)            | 0.13    |
| Baseline CDAI (Median, IQR)                                                                                       | 21.1<br>16.0-28.6   | 19.0<br>14.5-27.4              | 22.4<br>17.0-30.5              | <0.0001 |
| Erosive disease (N- %)<br>N=430                                                                                   | 150 (35%)           | 76 (45%)                       | 74 (28%)                       | 0.0004  |
| Joint deformity (N- %)<br>N=704                                                                                   | 196 (28%)           | 80 (31%)                       | 116 (26%)                      | 0.14    |
| Tender joint count (Median, IQR)                                                                                  | 7<br>4-12           | 6<br>4-10                      | 8<br>4-13                      | <0.0001 |
| Swollen joint count (Median, IQR)                                                                                 | 5<br>2-8            | 5<br>3-8                       | 5<br>2-8                       | 0.11    |
| Dactylitis (N- %) N=479                                                                                           | 47 (10%)            | 21 (12%)                       | 26 (8%)                        | 0.18    |
| Enthesitis (N- %) N=479                                                                                           | 35 (7%)             | 11 (6%)                        | 24 (8%)                        | 0.58    |
| Inflammatory Back Pain (N-%)<br>N=479                                                                             | 51 (11%)            | 15 (9%)                        | 36 (12%)                       | 0.32    |
| SI xray/MRI changes (N- %) N=479                                                                                  | 10 (2%)             | 3 (2%)                         | 7 (2%)                         | 0.70    |
| Patient Pain (Median, IQR)<br>N=705                                                                               | 55<br>30-73         | 49<br>25-70                    | 60<br>35-75                    | <0.0001 |
| Patient Global (Median, IQR)                                                                                      | 50<br>30-70         | 45<br>26-60                    | 53<br>32-72                    | <0.0001 |
| mHAQ (Median- IQR)<br>N=704                                                                                       | 0.5<br>0.125-0.875  | 0.375<br>0.125-0.75            | 0.5<br>0.25-1.0                | 0.0017  |
| Patient Fatigue (Median, IQR)<br>N=228                                                                            | 54<br>25-75         | 40<br>15-65                    | 63<br>32-80                    | <0.0001 |
| Race (N-%)                                                                                                        |                     |                                |                                |         |
| White                                                                                                             | 646 (92%)           | 235 (91%)                      | 411 (92%)                      | 0.58    |
| Asian                                                                                                             | 17 (2%)             | 11 (4%)                        | 6 (1%)                         |         |
| Black                                                                                                             | 10 (1%)             | 5 (2%)                         | 5 (1%)                         |         |

|                                     |           |           |           |                    |
|-------------------------------------|-----------|-----------|-----------|--------------------|
| Mixed Race                          | 9 (1%)    | 3 (1%)    | 6 (1%)    | (White             |
| Native American                     | 13 (2%)   | 1 (<1%)   | 12 (3%)   | versus             |
| Pacific Islander                    | 1 (<1%)   | 0 (0%)    | 1 (<1%)   | other)             |
| Other                               | 3 (<1%)   | 2 (1%)    | 1 (<1%)   |                    |
| Unknown                             | 7 (1%)    | 2 (1%)    | 5 (1%)    |                    |
| <b>Education (N-%) N=675</b>        |           |           |           |                    |
| Primary                             | 19 (3%)   | 7 (3%)    | 12 (3%)   | 0.13               |
| High School                         | 213 (32%) | 72 (28%)  | 141 (34%) | (College           |
| College/University                  | 439 (65%) | 175 (69%) | 264 (63%) | versus             |
| Unknown                             | 4 (1%)    | 1 (<1%)   | 3 (1%)    | other)             |
| <b>Marital Status (N-%) N=704</b>   |           |           |           |                    |
| Married/Partnered                   | 503 (71%) | 185 (71%) | 318 (71%) | 0.99 <sup>#</sup>  |
| Single                              | 108 (15%) | 47 (18%)  | 61 (14%)  |                    |
| Separated/Divorced                  | 66 (9%)   | 19 (7%)   | 47 (11%)  |                    |
| Widowed                             | 27 (4%)   | 8 (3%)    | 19 (4%)   |                    |
| <b>Work Status (N-%) N=702</b>      |           |           |           |                    |
| Full Time                           | 364 (52%) | 154 (60%) | 210 (47%) | 0.002 <sup>+</sup> |
| Part time                           | 56 (8%)   | 21 (8%)   | 35 (8%)   |                    |
| At home                             | 77 (11%)  | 24 (9%)   | 53 (12%)  |                    |
| Student                             | 5 (1%)    | 1 (0.4%)  | 4 (1%)    |                    |
| Disabled                            | 93 (13%)  | 19 (7%)   | 74 (17%)  |                    |
| Retired                             | 107 (15%) | 39 (15%)  | 68 (15%)  |                    |
| <b>Smoker (N-%) N=705</b>           |           |           |           |                    |
| Never                               | 370 (52%) | 150 (58%) | 220 (49%) | 0.05               |
| Previous                            | 204 (29%) | 71 (27%)  | 133 (30%) | 0.03 <sup>^^</sup> |
| Current                             | 131 (19%) | 38 (15%)  | 93 (21%)  |                    |
| <b>Alcohol intake (N-%) N=687</b>   |           |           |           |                    |
| Hypertension (N-%)                  | 234 (33%) | 82 (32%)  | 152 (34%) | 0.52               |
| Diabetes (N-%)                      | 86 (12%)  | 30 (12%)  | 56 (13%)  | 0.71               |
| Cardiovascular disease (N-%)        | 48 (7%)   | 17 (7%)   | 31 (7%)   | 0.85               |
| CCP or RF positive (N-%)            | 66 (21%)  | 25 (24%)  | 41 (20%)  | 0.44               |
| <b>N=310</b>                        |           |           |           |                    |
| CCP positive ever (N-%)             | 19 (13%)  | 8 (16%)   | 11 (11%)  | 0.42               |
| <b>N=150</b>                        |           |           |           |                    |
| RF positive ever (N-%)              | 48 (16%)  | 18 (18%)  | 30 (15%)  | 0.55               |
| <b>N=293</b>                        |           |           |           |                    |
| CRP (Median IQR)                    | 5         | 5         | 4         | 0.15               |
| N=227                               | 1.8-12    | 2-16      | 1.3-10    |                    |
| ESR (Median- IQR)                   | 15        | 17        | 15        | 0.11               |
| N=315                               | 6-29      | 6-29      | 7-29      |                    |
| Current prednisone (N-%)            | 105 (15%) | 34 (13%)  | 71 (16%)  | 0.32               |
| Current NSAIDs (N-%) N=700          | 360 (51%) | 136 (53%) | 224 (50%) | 0.50               |
| Current methotrexate (N-%)          | 383 (54%) | 144 (56%) | 239 (53%) | 0.58               |
| Any previous biologic therapy (N-%) | 385 (55%) | 108 (42%) | 277 (62%) | <0.0001            |

The number of patients with complete data on a given covariate is provided as the "N" next to each row title.

---

^ p-value for BMI category compares  $\leq 30$  versus  $>30$ ; \*p-value for race: white race versus all other races combined; \*\*p-value for education: college versus other; #p-value for marital status: single /separated/divorced/widowed versus married/partnered; \*p-value test for work status: full time work status versus other categories ^^p-value for smoker combines previous and current versus never smoker

---

**Supplementary Table 2. Sensitivity Analyses for Predictors of Achieving Remission (CDAI  $\leq$ 2.8)**

| Predictor                                       | Multivariable 2 |            | Multivariable 3 |            | Univariable_TNFNaive |           | Multivariable_TNFNaive |           |
|-------------------------------------------------|-----------------|------------|-----------------|------------|----------------------|-----------|------------------------|-----------|
|                                                 | OR              | 95%CI      | OR              | 95%CI      | OR                   | 95%CI     | OR                     | 95%CI     |
|                                                 | N=774           |            | N=774           |            | N=650                |           | N=650                  |           |
| Female sex                                      | 0.66            | 0.42-1.04  | 0.65            | 0.41- 1.01 | 0.50                 | 0.32-0.76 |                        |           |
| Age                                             | 0.98            | 0.96- 1.00 | 0.99            | 0.97- 1.01 | 0.98                 | 0.96-0.99 |                        |           |
| Body mass index (per 1 unit mg/k <sup>2</sup> ) |                 |            |                 |            | 0.93                 | 0.90-0.96 |                        |           |
| BMI >30 versus BMI $\leq$ 30                    | 0.49            | 0.31- 0.78 | 0.50            | 0.32- 0.80 | 0.37                 | 0.24-0.58 | 0.49                   | 0.31-0.79 |
| Baseline CDAI (per 5 units)                     |                 |            |                 |            | 0.79                 | 0.70-0.89 |                        |           |
| Tender Joint Count*                             |                 |            |                 |            | 0.92                 | 0.89-0.96 |                        |           |
| Patient pain (per 10 mm)                        | 0.79            | 0.72- 0.87 | 0.79            | 0.72- 0.87 | 0.75                 | 0.68-0.82 | 0.78                   | 0.71-0.86 |
| Patient Global (per 10 units)*                  |                 |            |                 |            | 0.74                 | 0.67-0.82 |                        |           |
| mHAQ (per 0.125 units)                          |                 |            |                 |            | 0.84                 | 0.78-0.91 |                        |           |
| College Education                               | 1.82            | 1.07- 3.09 | 1.76            | 1.03- 3.01 | 2.35                 | 1.41-3.93 | 1.85                   | 1.07-3.19 |
| Work full time                                  |                 |            |                 |            | 2.86                 | 1.79-4.58 | 1.82                   | 1.09-3.04 |
| Alcohol intake (yes/no)                         |                 |            |                 |            | 1.61                 | 1.04-2.50 |                        |           |
| Hypertension                                    |                 |            | 0.64            | 0.36- 1.14 | 0.57                 | 0.34-0.94 |                        |           |
| Diabetes                                        |                 |            |                 |            | 0.54                 | 0.24-1.21 |                        |           |
| Cardiovascular disease                          |                 |            |                 |            | 0.56                 | 0.20-1.62 |                        |           |
| Smoker (Prev/Current) vs Never                  |                 |            | 0.89            | 0.57- 1.40 | 0.92                 | 0.60-1.41 |                        |           |
| Current methotrexate                            |                 |            |                 |            | 0.85                 | 0.56-1.30 |                        |           |
| Any previous biologic use                       | 0.39            | 0.24- 0.62 | 0.39            | 0.25- 0.63 | 0.48                 | 0.31-0.75 | 0.55                   | 0.34-0.89 |
| Calendar year                                   | 1.06            | 0.97- 1.15 | 1.05            | 0.96- 1.15 | 1.03                 | 0.95-1.12 |                        |           |

Multivariable Model 2 forces age, sex and calendar year into the model.

Multivariable Model 3 forces age, sex, calendar year, education and hypertension.

“TNF naïve” models include only patients with no prior history of biologics

\*Tender joint counts and patient global are part of the CDAI and thus were not included in the final model.

All patients have a baseline CDAI>2.8.

c-statistics: MV2=0.774- MV3=0.780- TNF\_Naive=0.767

---

| <b>Supplementary Table 3. Sensitivity Analyses: Predictors of Achieving Low Disease Activity (CDAI ≤10)</b> |                        |               |                        |               |                              |               |                                |               |
|-------------------------------------------------------------------------------------------------------------|------------------------|---------------|------------------------|---------------|------------------------------|---------------|--------------------------------|---------------|
| <b>Predictor</b>                                                                                            | <b>Multivariable 2</b> |               | <b>Multivariable 3</b> |               | <b>Univariable_TNF_Naive</b> |               | <b>Multivariable_TNF_Naive</b> |               |
|                                                                                                             | <b>OR</b>              | <b>95% CI</b> | <b>OR</b>              | <b>95% CI</b> | <b>OR</b>                    | <b>95% CI</b> | <b>OR</b>                      | <b>95% CI</b> |
|                                                                                                             | N=706                  |               | N=706                  |               | N=590                        |               | N=590                          |               |
| Female sex                                                                                                  | 0.55                   | 0.40- 0.76    | 0.53                   | 0.38- 0.74    | 0.53                         | 0.38-0.75     | 0.59                           | 0.42-0.84     |
| Age                                                                                                         | 0.99                   | 0.98-1.01     | 0.99                   | 0.98- 1.01    | 0.99                         | 0.98-1.01     |                                |               |
| Body mass index (per 1 unit mg/k <sup>2</sup> )                                                             |                        |               |                        |               | 0.98                         | 0.95-1.00     |                                |               |
| BMI >30 versus BMI≤30                                                                                       |                        |               |                        |               | 0.70                         | 0.51-0.98     |                                |               |
| Baseline CDAI (per 5 units)                                                                                 | 0.88                   | 0.81- 0.96    | 0.90                   | 0.82- 0.98    | 0.87                         | 0.80-0.95     | 0.91                           | 0.83-0.99     |
| Tender joint count*                                                                                         |                        |               |                        |               | 0.95                         | 0.92-0.97     |                                |               |
| Patient pain (per 10 mm)                                                                                    | 0.93                   | 0.87- 0.99    | 0.93                   | 0.87- 1.00    | 0.86                         | 0.81-0.92     | 0.90                           | 0.84-0.97     |
| Patient Global (per 10 units)*                                                                              |                        |               |                        |               | 0.86                         | 0.80-0.92     |                                |               |
| mHAQ (per 0.125 units)                                                                                      |                        |               |                        |               | 0.93                         | 0.88-0.97     |                                |               |
| Work full time                                                                                              |                        |               |                        |               | 1.67                         | 1.20-2.34     |                                |               |
| College Education                                                                                           |                        |               | 1.18                   | 0.83- 1.68    | 1.29                         | 0.91-1.84     |                                |               |
| Smoker (Prev/Current) vs Never                                                                              |                        |               | 0.70                   | 0.50- 0.98    | 0.84                         | 0.60-1.16     |                                |               |
| Hypertension                                                                                                |                        |               | 0.96                   | 0.66- 1.40    | 0.88                         | 0.62-1.26     |                                |               |
| Diabetes                                                                                                    |                        |               |                        |               | 0.95                         | 0.57-1.60     |                                |               |
| Cardiovascular disease                                                                                      |                        |               |                        |               | 0.96                         | 0.49-1.88     |                                |               |
| Current methotrexate                                                                                        |                        |               |                        |               | 1.11                         | 0.80-1.55     |                                |               |
| Previous biologic use                                                                                       | 0.50                   | 0.36- 0.69    | 0.49                   | 0.35- 0.69    | 0.50                         | 0.36-0.70     | 0.55                           | 0.39-0.79     |
| Calendar year                                                                                               | 0.97                   | 0.91- 1.03    | 0.96                   | 0.90- 1.03    | 0.97                         | 0.91-1.03     |                                |               |

Multivariable Model 2 forces age, sex and calendar year into the model.  
 Multivariable Model 3 forces age, sex, calendar year, education and hypertension.  
 "TNF naïve" models include only patients with no prior history of biologics

\*Tender joint counts and patient global are part of the CDAI and thus were not included in the final model.

Only patients with baseline CDAI >10 were included in this model

c-statistics: MV2=0.670- MV3=0.679- TNF\_naive=0.652

---

**Supplementary Table 4. Sensitivity Analyses: Predictors of achieving modified Health Assessment Questionnaire (mHAQ) <0.3**

| Predictor                      | Multivariable 2 |           | Multivariable 3 |           | Univariable_TNF_naive |           | Multivariable_TNF_naive |           |
|--------------------------------|-----------------|-----------|-----------------|-----------|-----------------------|-----------|-------------------------|-----------|
|                                | OR              | 95% CI    | OR              | 95% CI    | OR                    | 95% CI    | OR                      | 95% CI    |
|                                | N=462           |           | N=462           |           | N=393                 |           | N=393                   |           |
| Female sex                     | 0.65            | 0.41-1.03 | 0.65            | 0.41-1.03 | 0.68                  | 0.44-1.06 |                         |           |
| Age at Initiation              | 0.98            | 0.96-1.00 | 0.98            | 0.96-1.00 | 0.97                  | 0.95-0.99 | 0.97                    | 0.95-0.99 |
| BMI >30 (versus ≤30)           | 0.60            | 0.38-0.95 | 0.56            | 0.35-0.90 | 0.47                  | 0.30-0.74 | 0.51                    | 0.32-0.82 |
| Duration PsA                   |                 |           |                 |           | 0.97                  | 0.95-1.00 |                         |           |
| Baseline mHAQ (per 0.125)      | 0.78            | 0.70-0.86 | 0.78            | 0.71-0.86 | 0.80                  | 0.72-0.88 | 0.78                    | 0.70-0.86 |
| Hypertension                   | 0.55            | 0.32-0.92 | 0.48            | 0.28-0.84 | 0.51                  | 0.31-0.83 |                         |           |
| Cardiovascular disease         |                 |           |                 |           | 0.36                  | 0.12-1.05 |                         |           |
| Diabetes                       |                 |           |                 |           | 0.58                  | 0.28-1.21 |                         |           |
| Work Full Time                 |                 |           |                 |           | 2.27                  | 1.46-3.55 |                         |           |
| Smoker (Prev/Current) vs Never |                 |           | 0.67            | 0.42-1.08 | 0.72                  | 0.46-1.11 |                         |           |
| Alcohol                        |                 |           |                 |           | 1.69                  | 1.08-2.64 |                         |           |
| Current methotrexate           |                 |           |                 |           | 1.27                  | 0.82-1.98 |                         |           |
| Previous biologic use          | 0.61            | 0.39-0.96 | 0.59            | 0.37-0.94 | 0.59                  | 0.38-0.92 | 0.62                    | 0.39-1.99 |
| College Education              |                 |           | 0.84            | 0.52-1.35 | 1.07                  | 0.68-1.69 |                         |           |
| Married/Partnered              |                 |           |                 |           | 0.77                  | 0.49-1.23 |                         |           |
| Prednisone                     |                 |           |                 |           | 0.63                  | 0.33-1.21 |                         |           |
| Patient Global                 |                 |           |                 |           | 0.99                  | 0.98-1.00 |                         |           |
| Patient Pain                   |                 |           |                 |           | 0.99                  | 0.98-1.00 |                         |           |
| Baseline CDAI (per 5 units)    |                 |           |                 |           | 0.99                  | 0.91-1.09 |                         |           |
| Tender joint count             |                 |           |                 |           | 0.96                  | 0.93-1.00 |                         |           |
| Swollen joint count            |                 |           |                 |           | 1.06                  | 1.02-1.10 |                         |           |
| Calendar year                  | 0.94            | 0.86-1.04 | 0.95            | 0.87-1.05 | 0.97                  | 0.88-1.06 |                         |           |

Multivariable Model 2 forces age, sex and calendar year into the model.

Multivariable Model 3 forces age, sex, calendar year, education.

“TNF naïve” models include only patients with no prior history of biologics

\*mHAQ ranges from 0-3 and the MCII for PsA is approximately 0.35; a score <0.3 is considered "normal." Only patients with mHAQ>0.3 at baseline were included in this model

Among these- 122 achieved a normal mHAQ at follow up- 26.4%.

Model c-statistics: MV2=0.736- MV3=0.741- TNF\_naive=0.730.

---

**Supplementary Table 5. Predictors of modified Health Assessment Questionnaire (mHAQ) decrease  $\geq 0.35$  at follow up visit closest to one year\***

| Predictor                   | Univariable |            | Multivariable (primary) |           | Multivariable 2 |           | Multivariable 3 |           |
|-----------------------------|-------------|------------|-------------------------|-----------|-----------------|-----------|-----------------|-----------|
|                             | OR          | 95% CI     | OR                      | 95% CI    | OR              | 95% CI    | OR              | 95% CI    |
| Female sex                  | 0.61        | 0.41-0.90  |                         |           | 0.66            | 0.43-1.02 |                 |           |
| Age at Initiation           | 0.96        | 0.94-0.97  | 0.96                    | 0.94-0.98 | 0.96            | 0.94-0.98 | 0.94            | 0.91-0.97 |
| BMI >30 (versus $\leq 30$ ) | 0.46        | 0.31-0.68  | 0.43                    | 0.28-0.66 | 0.42            | 0.27-0.65 | 0.45            | 0.23-0.86 |
| Duration PsA                | 0.978       | 0.95-1.00  |                         |           |                 |           |                 |           |
| Calendar Year               | 0.98        | 0.91-1.07  |                         |           | 1.01            | 0.93-1.11 |                 |           |
| Baseline mHAQ (per 0.125)   | 1.185       | 1.11-1.27  | 1.24                    | 1.15-1.34 | 1.23            | 1.14-1.33 | 1.26            | 1.10-1.44 |
| Hypertension                | 0.42        | 0.28-0.65  |                         |           |                 |           |                 |           |
| Cardiovascular disease      | 0.43        | 0.18-1.01  | 0.34                    | 0.13-0.91 | 0.34            | 0.13-0.89 |                 |           |
| Diabetes                    | 0.72        | 0.40-1.30  |                         |           |                 |           |                 |           |
| Work Full Time              | 1.53        | 1.04-2.25  |                         |           |                 |           |                 |           |
| Smoker (Prev/Current)       | 0.86        | 0.58-1.26  |                         |           |                 |           |                 |           |
| Alcohol                     | 1.10        | 0.75-1.63  |                         |           |                 |           |                 |           |
| Previous biologic use       | 0.64        | 0.44-0.95  | 0.56                    | 0.37-0.86 | 0.60            | 0.38-0.93 |                 |           |
| Current Methotrexate        | 1.04        | 0.71-1.53  |                         |           |                 |           |                 |           |
| College Education           | 0.993       | 0.67-1.48  |                         |           |                 |           |                 |           |
| Married/Partnered           | 0.60        | 0.40-0.91  |                         |           | 0.61            | 0.39-0.96 |                 |           |
| Prednisone                  | 1.16        | 0.71-1.92  |                         |           |                 |           |                 |           |
| Patient Global              | 0.998       | 0.998-1.01 |                         |           |                 |           |                 |           |
| Patient Pain                | 0.998       | 0.998-1.01 |                         |           |                 |           |                 |           |
| Baseline CDAI (per 5 units) | 1.008       | 0.93-1.09  |                         |           |                 |           |                 |           |
| Tender joint count          | 0.99        | 0.96-1.01  |                         |           |                 |           |                 |           |
| Swollen joint count         | 1.03        | 0.99-1.06  |                         |           |                 |           |                 |           |

\*mHAQ ranges from 0-3 and the MCII for PsA is approximately 0.35. Only patients with mHAQ > 0.3 at baseline were included in this model (N=462). Among these- 160 achieved a mHAQ decrease  $\geq 0.35$  at follow up- 34.6%.

Multivariable Model 2 forces age- sex and calendar year into the model- N=462.

Multivariable Model 3 includes only patients with no prior history of biologics- N=190

c-statistics: MV1=0.732- MV2=0.744- MV3= 0.753
